# Supplementary material for: Surgical outcomes in patients with Achilles tendon rupture—a retrospective study
Source: PeerJ. 2025 Jan 27;13:e18890. doi: 10.7717/peerj.18890 (PMC11781266; doi:10.7717/peerj.18890)
Supplement: Supplemental Information 1 [file peerj-13-18890-s001.xlsx]

## Sheet: Sayfa1
Sequence number	Gender	Age	Side	Comorbidity disease	Type of surgery	Rerupture	Balance disorder (absent:1 present:2)	Thumb weakness( present:1, absent:2)	AOFAS	AOFAS	VISA-A	VISA-A	Nerve injury	Infection	Duration of return to sport (Week)	Return to work times(Week)	Operated side Plantar flexion(Degree)	Non-operated side plantar flexion(Degree)	Opere side Heel Rise test (number)	non-operated side Heel rise test (number)	Operated side dorsoflexion (Degree)	non-operated side dorsoflexion(degree)	Forward jump operated side(centimeter)	Forward jump non-operated side(centimeter)	Vertical jump operated side(centimeter)	Vertical jump non-operated side(centimeter)
1	Male	24	Right	Steroid injection	Percutaneous repair	Present	Absent	Absent	88	Good	76	Fair	Present	Absent	44	20	40	42	10	20	17	22	140	144	21	21
2	Male	26	Right	None	Percutaneous repair	Absent	Absent	Absent	82	Good	80	Good	Absent	Absent	30	14	41	44	16	19	19	22	142	142	22	22
3	Male	18	Left	Steroid injection	Percutaneous repair	Present	Absent	Absent	88	Good	71	Fair	Absent	Absent	52	18	42	43	16	19	19	23	138	140	21	22
4	Male	34	Right	None	Percutaneous repair	Absent	Absent	Absent	90	Excellent	82	Good	Present	Absent	28	18	43	46	15	18	18	21	136	144	19	22
5	Male	33	Left	None	Percutaneous repair	Absent	Absent	Absent	84	Good	81	Good	Absent	Absent	30	13	43	46	14	16	19	21	144	144	20	21
6	Female	35	left	None	Percutaneous repair	Absent	Present	Absent	83	Good	73	Fair	Absent	Absent	35	12	42	46	16	18	18	23	152	160	18	21
7	Male	23	left	None	Percutaneous repair	Absent	Absent	Absent	91	Excellent	80	Good	Absent	Absent	31	13	41	45	14	16	19	24	136	144	20	22
8	Female	37	left	None	Percutaneous repair	Absent	Absent	Absent	83	Good	87	Good	Present	Absent	30	12	44	47	12	16	18	22	144	146	21	22
9	Male	34	Right	None	Percutaneous repair	Absent	Absent	Absent	90	Excellent	87	Good	Absent	Absent	32	14	43	45	14	16	18	24	130	140	22	21
10	Male	23	Right	None	Percutaneous repair	Absent	Present	Absent	82	Good	82	Good	Absent	Absent	32	16	42	47	14	20	19	23	146	150	21	22
11	Male	45	Right	None	Percutaneous repair	Absent	Present	Absent	92	Excellent	90	Excellent	Absent	Absent	23	10	44	46	15	18	20	23	144	140	22	22
12	Female	45	Right	None	Percutaneous repair	Absent	Absent	Absent	90	Excellent	92	Excellent	Absent	Absent	32	13	42	46	16	19	19	26	152	160	23	24
13	Male	43	Right	None	Percutaneous repair	Present	Absent	Absent	91	Excellent	81	Good	Absent	Absent	44	18	43	47	12	15	16	20	144	152	21	22
14	Male	23	Left	None	Percutaneous repair	Absent	Absent	Absent	74	Fair	85	Good	Absent	Absent	31	12	42	45	15	17	18	22	133	141	20	21
15	Male	26	Right	None	Open surgery+FHL augmentation	Absent	Absent	Present	82	Good	78	Fair	Present	Absent	30	12	46	46	18	20	20	24	134	138	18	20
16	Male	27	Right	None	Percutaneous repair	Absent	Absent	Absent	91	Excellent	88	Good	Absent	Absent	32	20	44	48	16	18	18	22	138	145	21	22
17	Male	39	Right	None	Percutaneous repair	Absent	Absent	Absent	91	Excellent	85	Good	Absent	Absent	30	12	45	48	17	19	19	24	142	150	21	22
18	Male	38	Right	None	Percutaneous repair	Absent	Absent	Absent	91	Excellent	92	Excellent	Absent	Absent	31	10	41	44	14	15	18	22	144	150	21	22
19	Female	34	Left	None	Percutaneous repair	Absent	Present	Absent	82	Good	83	Good	Absent	Absent	22	13	40	42	17	20	21	25	158	162	22	23
20	Male	39	Left	None	Open surgery+FHL augmentation	Absent	Absent	Absent	90	Excellent	90	Excellent	Absent	Absent	30	18	46	47	16	18	23	26	143	152	21	22
21	Male	24	Right	None	Open surgery+FHL augmentation	Absent	Absent	Present	90	Excellent	90	Excellent	Absent	Absent	28	14	44	46	15	16	24	26	141	148	20	22
22	Male	26	Right	None	Open surgery+FHL augmentation	Absent	Absent	Absent	90	Excellent	90	Excellent	Absent	Present	30	16	43	44	18	20	20	23	141	148	20	21
23	Male	37	Left	None	Open surgery+FHL augmentation	Absent	Absent	Absent	81	Good	90	Excellent	Absent	Present	28	16	46	47	16	18	22	23	133	138	20	22
24	Male	44	Right	Diabetes M.	V-Y plasty+FHL augmentation	Absent	Absent	Absent	84	Good	80	Good	Absent	Absent	40	18	47	48	14	19	23	25	120	136	16	20
25	Male	45	Left	Diabetes M.	V-Y plasty+FHL augmentation	Absent	Present	Absent	79	Fair	78	Fair	Absent	Present	39	15	35	37	13	18	24	25	122	135	17	20
26	Female	34	Right	None	Open surgery+FHL augmentation	Absent	Absent	Absent	88	Good	86	Good	Absent	Absent	32	16	39	40	15	17	24	26	144	150	18	21
27	Male	42	Right	None	Open surgery+FHL augmentation	Absent	Absent	Absent	92	Excellent	91	Excellent	Absent	Absent	24	20	43	44	14	16	23	24	139	144	20	21
28	Male	44	Right	None	Open surgery+FHL augmentation	Absent	Absent	Absent	94	Excellent	93	Excellent	Absent	Absent	22	14	44	46	16	18	22	25	134	142	20	21
29	Male	24	Right	None	Percutaneous repair	Absent	Absent	Absent	92	Excellent	90	Excellent	Present	Absent	29	10	40	42	15	18	18	22	140	144	21	21
30	Female	35	Left	None	Percutaneous repair	Absent	Absent	Absent	87	Good	77	Fair	Absent	Absent	25	12	46	46	15	17	16	23	152	160	18	21
31	Male	23	Left	None	Percutaneous repair	Absent	Absent	Absent	82	Good	75	Fair	Absent	Absent	31	13	43	45	16	20	19	24	136	144	20	22
32	Female	37	Left	None	Percutaneous repair	Absent	Absent	Absent	93	Excellent	88	Good	Absent	Absent	30	12	47	47	15	17	18	22	144	146	21	22
33	Male	34	Right	None	Percutaneous repair	Absent	Absent	Absent	88	Good	80	Good	Absent	Absent	32	14	41	45	15	17	19	24	130	140	22	21
34	Male	23	Right	None	Percutaneous repair	Absent	Absent	Absent	90	Excellent	89	Fair	Absent	Absent	32	16	44	47	17	19	20	23	146	150	21	22
35	Male	45	Left	None	Percutaneous repair	Absent	Absent	Absent	90	Excellent	85	Good	Absent	Absent	30	10	43	46	16	18	20	23	144	140	22	22
36	Female	45	Right	None	Percutaneous repair	Absent	Absent	Absent	90	Excellent	86	Good	Absent	Absent	30	13	44	46	14	16	19	26	152	160	23	24
37	Male	43	Right	None	Percutaneous repair	Absent	Absent	Absent	90	Excellent	90	Excellent	Absent	Absent	24	18	43	47	16	18	16	20	144	152	21	22
38	Male	23	Right	None	Percutaneous repair	Absent	Absent	Absent	90	Excellent	90	Excellent	Absent	Absent	21	12	41	45	15	19	18	22	133	141	20	21
39	Male	26	Right	None	Open surgery+FHL augmentation	Absent	Absent	Absent	95	Excellent	91	Excellent	Absent	Absent	24	12	43	44	16	19	23	24	130	138	18	20
40	Male	27	Right	None	Percutaneous repair	Absent	Absent	Absent	91	Excellent	88	Good	Absent	Absent	32	20	42	48	14	16	18	22	138	145	21	22
41	Male	34	Right	None	Percutaneous repair	Absent	Absent	Absent	93	Excellent	92	Excellent	Absent	Absent	30	12	41	48	15	17	20	24	142	150	21	22
42	Male	32	Right	None	Percutaneous repair	Absent	Absent	Absent	91	Excellent	90	Excellent	Absent	Absent	31	10	41	44	15	17	18	22	144	150	21	22
43	Female	34	Right	None	Percutaneous repair	Absent	Absent	Absent	89	Good	88	Good	Absent	Absent	32	13	40	42	16	18	20	25	158	162	22	23
44	Male	54	Right	Steroid injection	Open surgery+FHL augmentation	Absent	Absent	Absent	90	Excellent	92	Excellent	Absent	Absent	30	18	42	43	15	18	25	26	140	152	18	22
45	Male	24	Right	None	Open surgery+FHL augmentation	Absent	Absent	Present	90	Excellent	90	Excellent	Absent	Absent	32	14	44	44	16	18	24	26	142	148	19	22
46	Male	26	Right	None	Open surgery+FHL augmentation	Absent	Absent	Absent	93	Excellent	91	Excellent	Absent	Absent	30	16	42	42	14	16	23	23	140	148	20	21
47	Male	37	Right	None	Open surgery+FHL augmentation	Absent	Absent	Absent	82	Good	81	Good	Absent	Absent	42	16	41	41	15	17	21	23	133	138	19	22
48	Male	44	Right	None	V-Y plasty+FHL augmentation	Absent	Absent	Absent	78	Fair	70	Fair	Absent	Absent	41	18	40	40	12	18	23	25	130	136	16	20
49	Male	45	Left	None	V-Y plasty+FHL augmentation	Absent	Absent	Absent	76	Fair	70	Fair	Absent	Present	42	15	45	45	12	18	23	25	122	135	17	20
50	Female	34	Right	None	Open surgery+FHL augmentation	Absent	Absent	Absent	89	Good	81	Good	Absent	Absent	29	16	44	45	16	18	24	26	134	150	18	21
51	Female	48	Right	None	V-Y plasty+FHL augmentation	Absent	Present	Absent	65	Poor	62	Poor	Absent	Absent	28	18	39	40	11	18	22	25	123	136	16	20
52	Male	45	Left	None	V-Y plasty+FHL augmentation	Absent	Absent	Absent	81	Good	70	Fair	Absent	Present	29	15	46	47	14	19	21	25	126	135	18	17
53	Female	49	Right	None	V-Y plasty+FHL augmentation	Absent	Absent	Absent	81	Good	80	Good	Absent	Absent	28	18	39	40	13	18	22	25	123	136	16	20
54	Male	41	Right	None	V-Y plasty+FHL augmentation	Absent	Absent	Absent	81	Good	81	Good	Absent	Present	26	15	45	47	10	17	23	25	125	139	18	21
